# Supplementary material
Source: Research Square preprint supplement (doi:10.21203/rs.3.rs-8086622/v1)
Supplement: Supplementary file 1 [file d554088417e759d3d180ca84.docx]

**Supplementary Table 1: Completion rates by outcome and trial arm**

|  | **Total**  n (%) | **TAU**  n (%) | **Active control**  n (%) | **SMART**  n (%) |
| --- | --- | --- | --- | --- |
| **PDQ** |  |  |  |  |
| Baseline | 43 (100.0) | 14 (100.0) | 15 (100.0) | 14 (100.0) |
| Follow-up 1 | 27 (62.8) | 10 (71.4) | 9 (60.0) | 8 (57.1) |
| Follow-up 2 | 27 (62.8) | 7 (50.0) | 11 (73.3) | 9 (64.3) |
| **SDMT** |  |  |  |  |
| Baseline | 43 (100.0) | 14 (100.0) | 15 (100.0) | 14 (100.0) |
| Follow-up 1 | 32 (74.4) | 11 (78.6) | 12 (80.0) | 9 (64.3) |
| Follow-up 2 | 25 (58.1) | 9 (64.3) | 8 (53.3) | 8 (57.1) |
| **RBans (total index)** |  |  |  |  |
| Baseline | 39 (90.7) | 12 (85.7) | 15 (100.0) | 12 (85.7) |
| Follow-up 1 | 29 (67.4) | 10 (71.4) | 10 (66.7) | 9 (64.3) |
| Follow-up 2 | 25 (58.1) | 9 (64.3) | 8 (53.3) | 8 (57.1) |
| **PQ** |  |  |  |  |
| Baseline | 43 (100.0) | 14 (100.0) | 15 (100.0) | 14 (100.0) |
| Follow-up 1 | 34 (79.1) | 11 (78.6) | 14 (93.3) | 9 (64.3) |
| Follow-up 2 | 29 (67.4) | 11 (78.6) | 9 (60.0) | 9 (64.3) |
| **MFIS-5** |  |  |  |  |
| Baseline | 43 (100.0) | 14 (100.0) | 15 (100.0) | 14 (100.0) |
| Follow-up 1 | 28 (65.1) | 10 (71.4) | 9 (60.0) | 9 (64.3) |
| Follow-up 2 | 27 (62.8) | 7 (50.0) | 11 (73.3) | 9 (64.3) |
| **PHQ-9** |  |  |  |  |
| Baseline | 43 (100.0) | 14 (100.0) | 15 (100.0) | 14 (100.0) |
| Follow-up 1 | 28 (65.1) | 10 (71.4) | 9 (60.0) | 9 (64.3) |
| Follow-up 2 | 27 (62.8) | 7 (50.0) | 11 (73.3) | 9 (64.3) |
| **GAD-7** |  |  |  |  |
| Baseline | 43 (100.0) | 14 (100.0) | 15 (100.0) | 14 (100.0) |
| Follow-up 1 | 28 (65.1) | 10 (71.4) | 9 (60.0) | 9 (64.3) |
| Follow-up 2 | 27 (62.8) | 7 (50.0) | 11 (73.3) | 9 (64.3) |
| **ICECAP-A** |  |  |  |  |
| Baseline | 43 (100.0) | 14 (100.0) | 15 (100.0) | 14 (100.0) |
| Follow-up 1 | 28 (65.1) | 10 (71.4) | 9 (60.0) | 9 (64.3) |
| Follow-up 2 | 27 (62.8) | 7 (50.0) | 11 (73.3) | 9 (64.3) |
| **EQ-5D-5L** |  |  |  |  |
| Baseline | 43 (100.0) | 14 (100.0) | 15 (100.0) | 14 (100.0) |
| Follow-up 1 | 28 (65.1) | 10 (71.4) | 9 (60.0) | 9 (64.3) |
| Follow-up 2 | 27 (62.8) | 7 (50.0) | 11 (73.3) | 9 (64.3) |
